# Supplementary material
Source: Research Square preprint supplement (doi:10.21203/rs.3.rs-9734820/v1)
Supplement: Supplementary file 1 [file 4fcb9375959fa0a5ccbe89dd.xlsx]

## Sheet: Sheet1
Variable	Overall	Low	Med	High	p-value
	(N=1594)	(N=532)	(N=531)	(N=531)
Source (MIMICIV)	1390 (87.20%)	470 (88.35%)	431 (81.17%)	489 (92.09%)	<0.001
Age, y	63.00 [51.43, 76.00]	69.00 [57.00, 79.72]	61.84 [51.00, 75.00]	60.00 [47.00, 72.30]	<0.001
Gender (Female), (%)	773 (48.49%)	249 (46.80%)	264 (49.72%)	260 (48.96%)	0.61
Race, (%)
Asian	48 (3.01%)	21 (3.95%)	16 (3.01%)	11 (2.07%)	0.56
Black	105 (6.59%)	40 (7.52%)	31 (5.84%)	34 (6.40%)
Other	507 (31.81%)	166 (31.20%)	174 (32.77%)	167 (31.45%)
White	934 (58.59%)	305 (57.33%)	310 (58.38%)	319 (60.08%)
Severity of illness
GCS	14.00 [12.00, 15.00]	14.00 [11.00, 15.00]	14.00 [12.00, 15.00]	14.00 [13.00, 15.00]	0.16
SOFA	3.00 [2.00, 5.00]	4.00 [2.00, 6.00]	3.00 [2.00, 5.00]	2.00 [1.00, 4.00]	<0.001
OASIS	32.00 [26.00, 38.00]	34.00 [30.00, 40.00]	32.00 [26.00, 37.00]	29.00 [24.00, 34.00]	<0.001
Charlson	4.00 [2.00, 6.00]	5.00 [3.00, 7.00]	4.00 [2.00, 6.00]	3.00 [1.00, 5.00]	<0.001
Comorbidities
Hypertension, (%)	770 (48.31%)	279 (52.44%)	257 (48.40%)	234 (44.07%)	<0.05
Diabetes, (%)	314 (19.70%)	221 (41.54%)	64 (12.05%)	29 (5.46%)	<0.001
COPD, (%)	77 (4.83%)	23 (4.32%)	28 (5.27%)	26 (4.90%)	0.77
HF, (%)	185 (11.61%)	84 (15.79%)	65 (12.24%)	36 (6.78%)	<0.001
Sepsis, (%)	838 (52.57%)	349 (65.60%)	316 (59.51%)	173 (32.58%)	<0.001
Vital signs
MAP, mmHg	62.00 [54.17, 69.00]	60.00 [52.00, 67.00]	62.00 [55.00, 69.00]	63.00 [56.00, 70.00]	<0.001
Heart rate, beats/min	99.00 [88.00, 112.00]	103.00 [91.00, 115.00]	99.00 [87.00, 112.00]	96.00 [86.00, 109.00]	<0.001
Respiratory rate, times/min	26.00 [23.00, 30.00]	26.00 [23.00, 31.00]	26.00 [23.00, 29.00]	25.00 [22.00, 29.00]	<0.001
Temperature, °C	37.50 [37.17, 38.03]	37.61 [37.17, 38.17]	37.56 [37.17, 38.06]	37.44 [37.11, 37.89]	<0.001
Laboratory
Hb, g/dL	11.80 [10.50, 13.10]	11.60 [9.90, 12.90]	11.90 [10.60, 13.30]	11.90 [10.60, 13.10]	<0.01
Wbc, 10^9/L	11.20 [8.50, 14.57]	12.15 [9.42, 15.30]	11.20 [8.70, 15.10]	10.20 [7.85, 13.50]	<0.001
Plt, 10^9/L	200.50 [157.00, 253.00]	194.50 [152.75, 255.25]	202.00 [155.50, 248.00]	203.00 [161.00, 253.00]	0.5
Na, mmol/L	139.00 [137.00, 142.00]	138.04 [136.00, 142.00]	139.00 [137.00, 142.00]	139.00 [137.00, 141.00]	<0.05
K, mmol/L	4.00 [3.60, 4.40]	4.00 [3.60, 4.50]	3.92 [3.60, 4.30]	4.00 [3.60, 4.40]	0.07
Ca, mg/dL	8.50 [8.00, 8.90]	8.50 [8.00, 9.00]	8.40 [7.90, 8.80]	8.50 [8.10, 8.90]	<0.05
Cl, mmol/L	104.00 [101.00, 108.00]	104.00 [100.00, 107.00]	105.00 [102.00, 108.00]	104.00 [102.00, 107.00]	<0.001
Cre, mg/dL	0.80 [0.70, 1.10]	0.90 [0.70, 1.20]	0.80 [0.60, 1.10]	0.80 [0.60, 0.90]	<0.001
Blood glucose
FBG,mg/dL	134.00 [112.25, 167.75]	172.00 [138.00, 221.00]	136.00 [114.00, 158.00]	115.00 [101.00, 130.00]	<0.001
TWABG	130.68 [115.48, 152.57]	166.12 [151.60, 186.93]	130.74 [125.53, 135.75]	110.40 [103.28, 116.88]	<0.001
TIR,%	66.87 [34.07, 90.14]	21.00 [9.78, 34.07]	66.91 [58.62, 76.29]	95.81 [90.19, 100.00]	<0.001
Interventions
Mechanical_ventilation, (%)	820 (51.44%)	331 (62.22%)	296 (55.74%)	193 (36.35%)	<0.001
RRT, (%)	11 (0.69%)	8 (1.50%)	3 (0.56%)	0 (0.00%)	<0.05
Vaso, (%)	312 (19.57%)	131 (24.62%)	120 (22.60%)	61 (11.49%)	<0.001
Insulin, (%)	372 (23.34%)	260 (48.87%)	95 (17.89%)	17 (3.20%)	<0.001
Outcome
28-day Survival Time (days)	28.00 [28.00, 28.00]	28.00 [9.82, 28.00]	28.00 [28.00, 28.00]	28.00 [28.00, 28.00]	<0.001
Day28outcome, (%)	319 (20.01%)	186 (34.96%)	91 (17.14%)	42 (7.91%)	<0.001
180-day Survival Time (days)	180.00 [90.45, 180.00]	180.00 [9.82, 180.00]	180.00 [180.00, 180.00]	180.00 [180.00, 180.00]	<0.001
Day180outcome, (%)	432 (27.10%)	234 (43.98%)	125 (23.54%)	73 (13.75%)	<0.001
